# Supplementary material for: ANT1 Activation and Inhibition Patterns Support the Fatty Acid Cycling Mechanism for Proton Transport
Source: MDPI journal article supplement (doi:10.3390/ijms22052490), 2021-03-02
Supplement: s1 [file s1]

## **ANT1 activation and inhibition patterns support the fatty acid cycling mechanism for the proton transport**

Jürgen Kreiter<sup>1</sup>, Anne Rupprecht<sup>1,2</sup>, Sanja Škulj<sup>3</sup>, Zlatko Brkljača<sup>3</sup>, Kristina Žuna<sup>1</sup>, Denis G. Knyazev<sup>4</sup>, Sarah Bardakji<sup>1</sup>, Mario Vazdar<sup>3,5</sup>, Elena E. Pohl<sup>1,\*</sup>

<sup>1</sup>Institute of Physiology, Pathophysiology and Biophysics, Department of Biomedical Sciences, University of Veterinary Medicine, 1210 Vienna, Austria

<sup>2</sup>Institute of Pharmacology and Toxicology, Rostock University Medical Center, 18057 Rostock, Germany

<sup>3</sup>Division of Organic Chemistry and Biochemistry, Rudjer Bošković Institute, 10000 Zagreb, Croatia

<sup>4</sup>Institute of Biophysics, Johannes Kepler University Linz, 4020 Linz, Austria

<sup>5</sup>Institute of Organic Chemistry and Biochemistry, Czech Academy of Sciences, Flemingovo nám. 2, 16610 Prague 6, Czech Republic

## **Supplementary Figures**

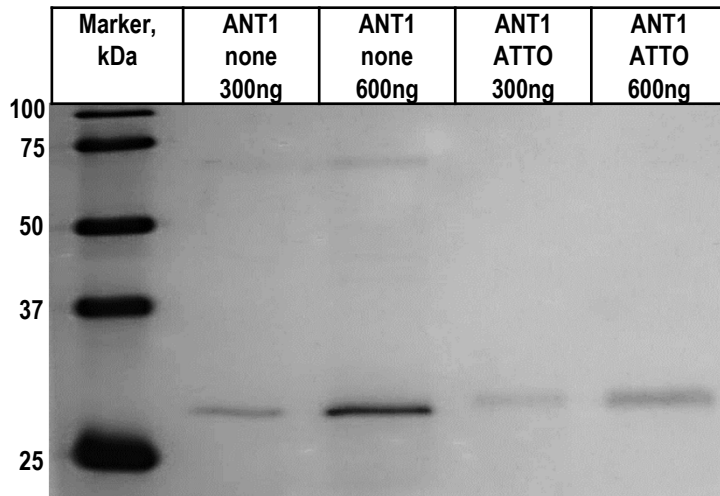

**Supplementary Fig. 1. Representative silverstaining of murine ANT1.**

For quality control, 300 ng or 600 ng of proteoliposomes were loaded onto a 15% acrylamide gel and SDS-PAGE was conducted. Subsequently, proteins were visualized by silver staining. Precision Plus ProteinT Dual Color Standard (Bio-Rad) was loaded as a molecular weight marker. ANT1 shown in the third and forth lanes was stained by fluorescent dye ATTO.

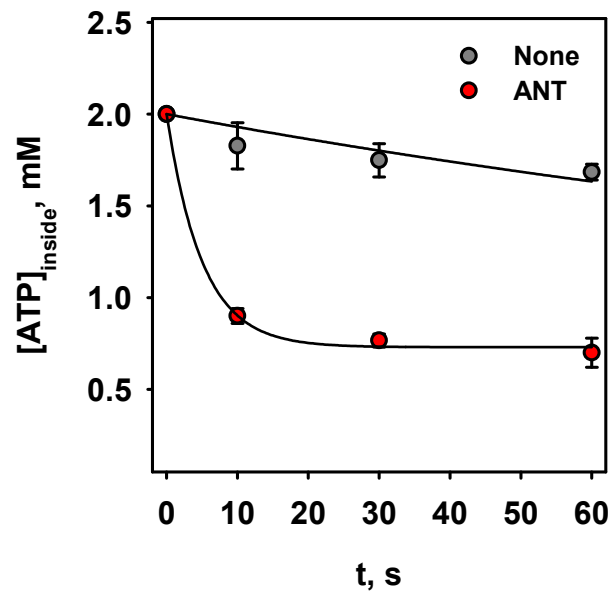

**Supplementary Fig. 2. ADP/ATP exchange mediated by the recombinant murine ANT1 reconstituted in proteoliposomes.**

Time course of the  $^3\text{H}$ -ATP concentration inside empty liposomes (grey) and ANT1-containing liposomes (red) after the addition of 2 mM ADP to the buffer solution at  $t = 0$  s. Lines are the least-square fit of an exponential function to the data. The initial concentration of  $^3\text{H}$ -ATP inside liposomes was 2 mM. In all measurements, membranes were made of 1 mg/ml lipid mixture (DOPC:DOPE:CL=45:45:10 mol%). Protein concentration estimated by BCA assay was 1.7  $\mu\text{g}/(\text{mg}$  of lipid). Buffer solution contained 50 mM  $\text{Na}_2\text{SO}_4$ , 10 mM Tris, 10 mM MES and 0.6 mM EGTA at pH = 7.34 and  $T = 295$  K. Data are displayed as the mean  $\pm$  SD of at least three independent measurements.

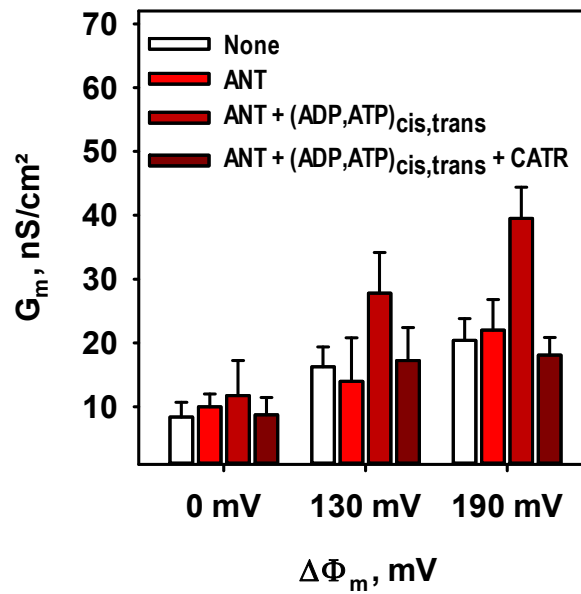

**Supplementary Fig. 3. Dependence of ANT1- mediated ADP/ATP exchange on the transmembrane potential ( $\Delta\Phi_m$ ).**

Total membrane conductance ( $G_m$ ) of lipid bilayers in the absence (first bar) and presence of ANT1 (second bar), ANT1 and 2 mM ATP and 2 mM ADP in the buffer solution (third bar) and ANT1 and 2 mM ATP, ADP and 100  $\mu$ M CATR (fourth bar) in the buffer solution evaluated at  $\Delta\Phi_m$  - 0, 130 and 190 mV. Values at 0 mV were deduced from a linear fit to current-voltage recordings from -50 to + 50 mV.

Experimental conditions – as described in Suppl. Fig. 2. Protein concentration estimated by BCA assay was 4  $\mu$ g/(mg of lipid). Data are displayed as the mean  $\pm$  SD of at least three independent measurements.

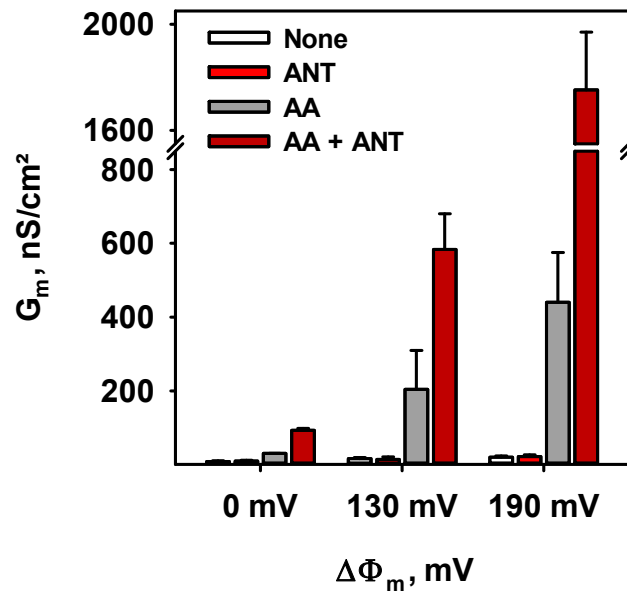

**Supplementary Fig. 4. Dependence of ANT1-mediated proton transport on the transmembrane potential ( $\Delta\Phi_m$ ).**

Total membrane conductance ( $G_m$ ) of lipid bilayers in the presence of ANT (light red), AA (grey) and ANT and AA (dark red) and in the absence of ANT and AA (white) evaluated at  $\Delta\Phi_m$  - 0, 130 and 190 mV. Values at 0 mV were deduced from a linear fit to current voltage recordings from -50 to + 50 mV.

Experimental conditions – as described in Suppl. Fig. 2. Protein concentration estimated by BCA assay was 4  $\mu\text{g}/(\text{mg of lipid})$ . Data are displayed as the mean  $\pm$  SD of at least three independent measurements.

**a**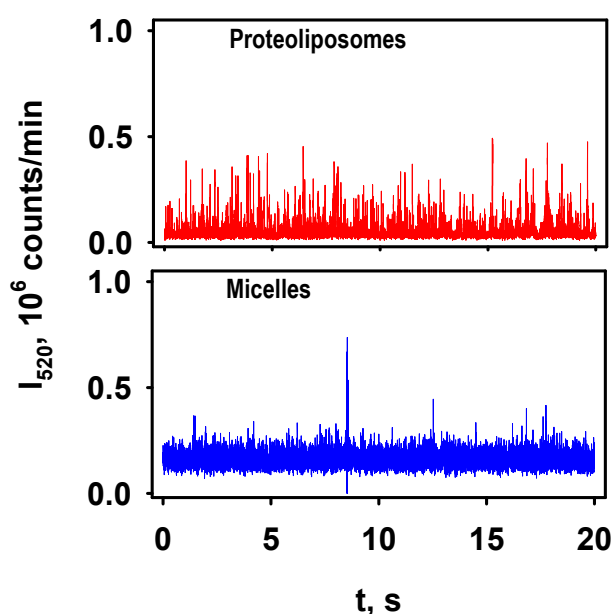**b**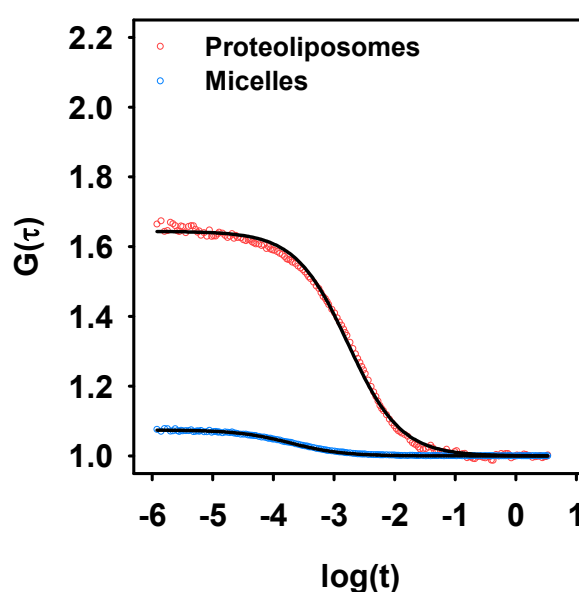

**Supplementary Fig. 5. Fluorescence correlation spectroscopy of fluorescently labelled ANT in proteoliposomes and after solubilizing into SDS.**

**a**, Time course of the fluorescence intensity of fluorescently labelled ANT1 in proteoliposomes (red, top) and solved in 2% (v/v) SDS (blue, bottom).

**b**, Autocorrelation function  $G(\tau)$  of the temporal signal of fluorescently labeled ANT1 in proteoliposomes (red) and solubilization in 2% (v/v) SDS (blue).

In all measurements, proteoliposomes were made of 45:45:10 mol% DOPC:DOPE:CL and the lipid concentration was 4 mg/ml. Protein concentration measured by the BCA assay was 23.2  $\mu\text{g/ml}$ . The buffer contained 50 mM  $\text{Na}_2\text{SO}_4$ , 10 mM Tris, 10mM MES, 0.6 mM EGTA and 10% (v/v) glycerol at pH = 7.34 and R.T.
