# Supplementary material for: ANT1 Activation and Inhibition Patterns Support the Fatty Acid Cycling Mechanism for Proton Transport
Source: MDPI journal article supplement (doi:10.3390/ijms22052490), 2021-03-02
Supplement: s1 [file s1]

## **ANT1 regulation supports the fatty acid cycling mechanism for the proton transport**

Jürgen Kreiter<sup>1</sup>, Anne Rupprecht<sup>1,2</sup>, Sanja Škulj<sup>3</sup>, Zlatko Brkljača<sup>3</sup>,  
Kristina Žuna<sup>1</sup>, Denis G. Knyazev<sup>4</sup>, Sarah Bardakji<sup>1</sup>, Mario  
Vazdar<sup>3,5</sup>, Elena E. Pohl<sup>1,\*</sup>

<sup>1</sup>Institute of Physiology, Pathophysiology and Biophysics, Department of Biomedical Sciences, University of Veterinary Medicine, Vienna, Austria

<sup>2</sup>Institute of Pharmacology and Toxicology, Rostock University Medical Center, Rostock, Germany

<sup>3</sup>Division of Organic Chemistry and Biochemistry, Rudjer Bošković Institute, Zagreb, Croatia

<sup>4</sup>Institute of Biophysics, Johannes Kepler University Linz, Linz, Austria

<sup>5</sup>Institute of Organic Chemistry and Biochemistry, Czech Academy of Sciences, Flemingovo nám. 2, 16610 Prague 6, Czech Republic

## **Supplementary Tables**

**Supplementary Table 1: Overview of ADP/ATP exchange rate of ANT reconstituted into liposomes described in literature.**

| Protein                                   | $k_{\text{ADP/ATP}}$<br>mmol/min/g | Nucleotides                                                                          | T, K | Technique     | Ref.          |
|-------------------------------------------|------------------------------------|--------------------------------------------------------------------------------------|------|---------------|---------------|
| Isolated ANT from beef heart mitochondria | 0.05 – 0.2                         | ADP/ATP <sub>internal</sub> = 5 mM<br>ADP/ATP <sub>external</sub> = 10 - 100 $\mu$ M | 296  | Radioactivity | [1]           |
| Yeast ANT2                                | 3.9 – 8.3                          | ADP/ATP <sub>internal</sub> = 20 mM<br>ADP/ATP <sub>external</sub> = 100 $\mu$ M     | 283  | Radioactivity | [2]           |
| Yeast ANT2                                | 10.7                               | ADP <sub>internal</sub> = 5 mM<br>ADP <sub>external</sub> = 1.5 $\mu$ M              | 296  | Radioactivity | [3]           |
| Recombinant murine ANT1                   | 3.49 $\pm$ 0.41                    | ADP <sub>internal</sub> = 2 mM<br>ADP <sub>external</sub> = 2 mM                     | 296  | Fluorescence  | [4]           |
|                                           | 2.90 $\pm$ 0.47                    |                                                                                      |      | Radioactivity |               |
| Recombinant murine ANT1                   | 5.53 $\pm$ 0.74                    | ADP <sub>internal</sub> = 2 mM<br>ADP <sub>external</sub> = 2 mM                     | 296  | Radioactivity | In this study |

- [1] Kraemer, R., & Klingenberg, M. (1982). Electrophoretic control of reconstituted adenine nucleotide translocation. *Biochemistry*, 21(5), 1082-1089.
- [2] Heidkämper, D., Müller, V., Nelson, D. R., & Klingenberg, M. (1996). Probing the role of positive residues in the ADP/ATP carrier from yeast. The effect of six arginine mutations on transport and the four ATP versus ADP exchange modes. *Biochemistry*, 35(50), 16144-16152.
- [3] King, M. S., Kerr, M., Crichton, P. G., Springett, R., & Kunji, E. R. (2016). Formation of a cytoplasmic salt bridge network in the matrix state is a fundamental step in the transport mechanism of the mitochondrial ADP/ATP carrier. *Biochimica et Biophysica Acta (BBA)-Bioenergetics*, 1857(1), 14-22.
- [4] Kreiter, J., Beitz, E., & Pohl, E. E. (2020). A Fluorescence-Based Method to Measure ADP/ATP Exchange of Recombinant Adenine Nucleotide Translocase in Liposomes. *Biomolecules*, 10(5), 685.

**Supplementary Table 2: Total membrane conductance at 0, 130 and 190 mV.**  
 Respective values as shown in Suppl. Fig. 3 and 4.

|                     | G <sub>m</sub> , nS/cm <sup>2</sup> |            |                 |                        |            |            |
|---------------------|-------------------------------------|------------|-----------------|------------------------|------------|------------|
| $\Delta\Phi_m$ , mV | None                                | ANT        | ANT + (ADP,ATP) | ANT + (ADP,ATP) + CATR | AA         | ANT        |
| 0                   | 8.41 ± 2.31                         | 10.0 ± 2.0 | 11.8 ± 5.5      | 8.78 ± 2.69            | 30.8 ± 0.3 | 93.3 ± 5.1 |
| 130                 | 16.3 ± 3.1                          | 14.0 ± 6.8 | 27.8 ± 6.4      | 17.2 ± 5.2             | 204 ± 106  | 584 ± 97   |
| 190                 | 20.4 ± 3.4                          | 22.0 ± 4.8 | 39.5 ± 4.9      | 18.1 ± 2.7             | 440 ± 135  | 1750 ± 220 |

**Supplementary Table 3: Overview of fatty acid activated H<sup>+</sup> turnover number of UCP and ANT reconstituted into proteoliposomes**

Fatty acids are: AA – arachidonic acid (C20:4), LA – lauric acid (C12:0), OA – oleic acid (C18:1) and PA - palmitic acid (C16:0). \* Values are recalculated; \*\* 6-methoxy-N-(3-sulfopropyl)quinolinium

| Protein                                         | $k_{H^+}$ , s <sup>-1</sup> | Fatty acid     | T, K | Measurement system                                  | Ref.          |
|-------------------------------------------------|-----------------------------|----------------|------|-----------------------------------------------------|---------------|
| Isolated hamster UCP1                           | 2 - 10                      | n.a.           | 284  | Proteoliposomes subjected to a pH electrode         | [1]           |
| Recombinant rat UCP1, human UCP2 and human UCP3 | 5.3 – 15.9*                 | 40 $\mu$ M PA  | n.a. | Proteoliposomes loaded with SPQ** fluorescence dye  | [2]           |
| Isolated hamster UCP1                           | 14 $\pm$ 5                  | 14.5 mol% OA   | 295  | Planar lipid bilayer with transmembrane pH gradient | [3]           |
| Recombinant human UCP2                          | 4.8                         | 15 mol% AA     | 310  |                                                     | [4]           |
| Recombinant human UCP2                          | 0.85 – 2.08*                | 100 $\mu$ M LA | 298  | Proteoliposomes loaded with SPQ** fluorescence dye  | [5]           |
| Recombinant human UCP4                          | 0.35 – 0.58*                | 100 $\mu$ M LA | 298  |                                                     |               |
| Recombinant human UCP5                          | 1.39 – 2.67*                | 100 $\mu$ M LA | 298  |                                                     |               |
| Recombinant murine UCP3                         | 2.56 $\pm$ 0.79             | 15 mol% AA     | 305  | Planar lipid bilayer with transmembrane pH gradient | [6]           |
| Recombinant murine UCP1                         | 5.56 $\pm$ 0.38             | 15 mol% AA     | 305  |                                                     | [7]           |
| Recombinant murine UCP3                         | 4.10 $\pm$ 0.71             | 15 mol% AA     | 305  |                                                     |               |
| Recombinant murine ANT1                         | 14.6 $\pm$ 2.5              | 15 mol% AA     | 305  | Planar lipid bilayer with transmembrane pH gradient | In this study |

## References:

- [1] Klingenberg, M., & Winkler, E. (1985). The reconstituted isolated uncoupling protein is a membrane potential driven H<sup>+</sup> translocator. *The EMBO journal*, 4(12), 3087-3092.
- [2] Jabůrek, M., Vařecha, M., Gimeno, R. E., Dembski, M., Ježek, P., Zhang, M., ... & Garlid, K. D. (1999). Transport function and regulation of mitochondrial uncoupling proteins 2 and 3. *Journal of Biological Chemistry*, 274(37), 26003-26007.
- [3] Urbánková, E., Voltchenko, A., Pohl, P., Ježek, P., & Pohl, E. E. (2003). Transport kinetics of uncoupling proteins analysis of UCP1 reconstituted in planar lipid bilayers. *Journal of Biological Chemistry*, 278(35), 32497-32500.
- [4] Beck, V., Jaburek, M., Demina, T., Rupprecht, A., Porter, R. K., Jezek, P., & Pohl, E. E. (2007). Polyunsaturated fatty acids activate human uncoupling proteins 1 and 2 in planar lipid bilayers. *The FASEB Journal*, 21(4), 1137-1144.
- [5] Hoang, T., Smith, M. D., & Jelokhani-Niaraki, M. (2012). Toward understanding the mechanism of ion transport activity of neuronal uncoupling proteins UCP2, UCP4, and UCP5. *Biochemistry*, 51(19), 4004-4014.
- [6] Macher, G., Koehler, M., Rupprecht, A., Kreiter, J., Hinterdorfer, P., & Pohl, E. E. (2018). Inhibition of mitochondrial UCP1 and UCP3 by purine nucleotides and phosphate. *Biochimica et Biophysica Acta (BBA)-Biomembranes*, 1860(3), 664-672.
- [7] Kreiter, J., & Pohl, E. E. (2019). A micro-agar salt bridge electrode for analyzing the proton turnover rate of recombinant membrane proteins. *JoVE (Journal of Visualized Experiments)*, (143), e58552.

**Supplementary Table 4: IC50 and maximum inhibition of the interaction of CATR, BA and PN with ANT.**

Respective values deduced as fitting parameters in Fig. 4 and 5.

| Inhibitor | EC50, mM          | Maximum inhibition, % |
|-----------|-------------------|-----------------------|
| CATR      | $0.019 \pm 0.002$ | $64.2 \pm 2.8$        |
| BA        | $0.032 \pm 0.011$ | $44.3 \pm 5.7$        |
| ATP       | $0.250 \pm 0.034$ | $95.7 \pm 5.7$        |
| ADP       | $1.310 \pm 0.537$ | $107 \pm 15$          |
| AMP       | $2.657 \pm 0.817$ | $63.7 \pm 8.7$        |
| GTP       | $3.324 \pm 0.093$ | $48.4 \pm 0.1$        |
| GDP       | $5.408 \pm 2.008$ | $65.0 \pm 20.0$       |
| GMP       | $> 10$            | n.a.                  |
